1 **Diazinon residues levels in farm-gate *Brassica oleracea* var. *acephala* of Kimira-Oluch**  
2 **Smallholder Farm Improvement Project, Kenya**

3  
4 **George Odoyo Oromo\*<sup>1</sup>; Philip Okinda Owuor<sup>1</sup>; Bowa Kwach<sup>1</sup>; Peter Otieno<sup>2</sup>**

5 **<sup>1</sup>Department of Chemistry, Maseno University, P. O. Box 333 - 40105, Maseno. Kenya. <sup>2</sup>Pest**  
6 **Control Products Board, P.O. Box 2757, 40100, Kisumu, Kenya.**

7  
8 **\*Correspondence author email: [oroge2002@gmail.com](mailto:oroge2002@gmail.com), ORCID link: [https://orcid.org/0000-](https://orcid.org/0000-0001-9277-537X)**  
9 **0001-9277-537X**

10  
11 **ABSTRACT**

12 Pesticides use in vegetable production often has residual effects on the plants and environment with  
13 potential health risks. Diazinon, though associated with human health impacts, is a popular pesticide  
14 in the production of *Brassica oleracea* var. *acephala* at the Kimira-Oluch Smallholder Farmers  
15 Improvement Project (KOSFIP), Kenya. The long preharvest interval (PHI) of diazinon application  
16 may not be observed by farmers with inadequate appreciation of Good Agricultural Practices  
17 (GAP). It is not documented whether diazinon residues levels in the farm-gate *Brassica oleracea*  
18 var. *acephala* of KOSFIP could be a health risk to the consumers. The diazinon residues levels and  
19 corresponding health risks in farm-gate *Brassica oleracea* var, *acephala* at KOSFIP were  
20 determined. Cross-sectional survey based on snowball sampling identified 40 farms applying  
21 diazinon on the vegetable. Triplicate samples were collected from each farm for residue analysis,  
22 using the QuEChERS method, and LC-ESI-MS/MS analysis. Standard normal distribution function  
23  $f(z)$ , revealed  $\approx 78\%$  of farm-gate samples had detectable residual diazinon levels and 70% were  
24 above the Codex MRL of 0.05 mg/kg. The farm-gate *Brassica oleracea* var. *acephala* are exposing  
25 consumers to health risks. Efforts must be intensified to ensure GAP are adopted. The estimated  
26 farm-gate samples with health risk indices for children and adults (HRLc and HRLa)  $> 1.0$  were 64%

27 and 26%, respectively. Farm-gate *Brassica oleracea* var. *acephala* diazinon levels are therefore  
28 causing high health risks to both children and adults. Farm-gate residual levels and HRI were  
29 comparatively higher than findings of most previous studies. Inappropriate label PHI and  
30 malpractices against GAP may be responsible for high residual levels. There should be regular  
31 surveillance and trainings of farmers on GAP for sustainable production of *Brassica oleracea* var.  
32 *acephala* in the Lake Victoria region. Use of diazinon on *Brassica oleracea* var. *acephala* should be  
33 discouraged and alternative approaches including integrated pest management practices should be  
34 encouraged.

35

36 **Key words:** Diazinon; *Brassica oleracea* Var. *acephala*; Farm-gate; residue levels,; health risk  
37 assessment; KOSFIP.

38

## 39 INTRODUCTION

40 Pesticides enhance crop production for the increasing global population towards the realization of  
41 sustainable development goals (SDGs) of the United Nations (1,2). However, synthetic pesticides  
42 residues, magnified by malpractices in use, are ubiquitous contaminants in the environment (3–5).  
43 The residues pose serious to lethal health hazards to non-target organisms through inhalation,  
44 contact and ingestion of the contaminated foodstuffs (6,7). Approximately 30% (based on mass) of  
45 human food is of vegetable origin, mostly consumed raw or semi-processed. Vegetables can  
46 therefore be sources of pesticide residues to human beings more than other food groups (8) since  
47 most vegetable production uses various pesticides. Ingestion of contaminated foodstuffs is a major  
48 exposure route to pesticide residues (9). It is necessary that vegetables treated with pesticides during  
49 production are evaluated for pesticide residue safety levels to protect the consumers against food  
50 safety hazards and risks.

51 *Brassica oleracea* var. *acephala* is grown in many parts of the world (10,11) as food and for its  
52 numerous health benefiting metabolites that minimize the risk of degenerative diseases like cancer

53 (6,12). However, cultivation of the vegetable involves application of pesticides for the management  
54 of pests and diseases that attack the roots and foliage (13–15). In Kenya, diazinon (*O,O*-diethyl-*O*-  
55 (2-isopropyl-6-methyl-4-pyrimidinyl)phosphorothioate) is one of the broad-spectrum pesticides  
56 registered for use in *Brassica oleracea* var. *acephala* production (16). Diazinon is expected to  
57 undergo dissipation through chemical degradation processes and other forms of physical  
58 transformations including surface wash-off from the leaves. The total dissipation effect are expected  
59 to reduce diazinon residues to levels below the Codex maximum residue limit (MRL) of 0.05 mg/kg  
60 when diazinon is applied according to good agricultural practices (GAP) (17).

61 Kimira-Oluch Smallholder Farmers Improvement Project (KOSFIP) is an irrigation project located  
62 in Homa Bay County in the Republic of Kenya. The area is characterized by hot and humid climatic  
63 conditions with scanty rainfall of high variability in duration and amounts (18,19). High relative  
64 humidity of the location is due to close proximity to Lake Victoria and the irrigation water channels  
65 of the project. These conditions promote rapid spread of vegetable pests and diseases (20,21). The  
66 smallholder farmers manage the pests by use of synthetic pesticides. Though diazinon has been  
67 used by the smallholder farmers of *Brassica oleracea* var. *acephala* at KOSFIP, the long pre-  
68 harvest interval (PHI) of 12 days (16) may not be observed by the farmers (5). Consequently, it is  
69 possible that residues of diazinon in *Brassica oleracea* var. *acephala* grown in KOSFIP may be  
70 above Codex MRL. Unfortunately, farm and market gate basket screening of diazinon residues in  
71 the produce at KOSFIP is not documented. The diazinon residues in the farm gate *Brassica*  
72 *oleracea* var. *acephala* vegetables might be a health risk to the consumers. Consequently, a survey  
73 of diazinon residue levels in farm gate vegetables and the health risks the residue levels may pose  
74 were investigated. The survey results of farm gate diazinon residues in *Brassica oleracea* var.  
75 *acephala* vegetables are reported herein.

## 76 MATERIALS AND METHODS

### 77 Study area

78 This study was carried out within the Kimira-Oluch Smallholder Farmers Improvement Project  
79 (KOSFIP) site. KOSFIP is an irrigation project located in Rachuonyo (Kimira site) and Homa Bay  
80 (Oluch site) sub-counties of Homa Bay County in Kenya (Figure 1)(22). The site lies between  
81 latitudes 0° 20' S and 0° 30' S and longitudes 34° 30' E and 34° 39' E at an altitude of 1154 m above  
82 mean sea level along the shores of Lake Victoria (Figure 2)(23). Kimira site has an area of 1,790 ha  
83 out of which 808 ha have been developed into 44 farming blocks whilst Oluch site has an area of  
84 1,308 ha with only 666 ha split into 53 farming blocks have been irrigated (19). The area is sub-  
85 humid with mean annual rainfall of between 740 and 1200 mm with short and long rainy seasons  
86 during April-May and November-December, respectively, and mean annual maximum temperatures  
87 of 31°C and minimum of 18°C (18,19). The relative humidity is significantly high ranging between  
88 60 and 75% with potential evapotranspiration rate at 1800mm and 2000 mm per annum. Apart from  
89 the rains, the farms are irrigated, thereby producing vegetables throughout the year. The sites have  
90 fertile alluvial soils originating from the nutrient alluvial deposits washed downstream from the  
91 rivers and erosions from the Gusii highlands.

92

### 93 Research design

94 A cross-sectional survey design based on purposive and snowball sampling techniques were used to  
95 identify forty-five farms of *Brassica oleracea* var. *acephala* that use diazinon in vegetable  
96 production. The survey was carried out during dry season (February to March, 2020) in both Kimira  
97 and Oluch sites of the project. During the period, Kimira site had 18 active blocks with *Brassica*  
98 *oleracea* var. *acephala* while Oluch had 35 sites. In addition, during sampling, Kimira site had 12  
99 farms while Oluch had 33 farms. The criteria for snowballing included same vegetable variety  
100 treated with diazinon only at first harvest. Among the forty-five farms, 40 were selected (24).  
101 Kimira had 11 farms while Oluch had 29 farms. The farms were spread equitably to represent

102 Kimira and Oluch sections of the project, considering all the 97 blocks making the project area.  
103 Sampling was biased to farms of *Brassica oleracea* var. *acephala* that had been treated with  
104 diazinon before the first harvest after planting. From every farm, 1 Kg of freshly harvested *Brassica*  
105 *oleracea* var. *acephala*, replicated three times were collected to make 120 samples.

106

### 107 **Sample processing, preparation, extraction and partitioning**

108 The processing, preparations, extraction and partitioning of the vegetable samples for diazinon  
109 residues analysis were carried out using Quick Easy Cheap Effective Rugged and Safe  
110 (QuEChERS) multi-residue method (25) as adopted and validated by the Analytical Chemistry  
111 Laboratories of Kenya Plant Health Inspectorate Services (KEPHIS) method M0326 as follows.

112

### 113 **Sample processing and preparation**

114 The vegetable samples were coarsely cut with a knife then chopped and homogenized with a Hobart  
115 food processor. About 100 g of the homogenized samples were placed in sample containers and  
116 were then stored frozen at  $-18^{\circ}\text{C} \pm 5^{\circ}\text{C}$  in readiness for extraction.

117

### 118 **Extraction and partitioning of samples**

119 A  $10.0 \pm 0.1$  g of the homogenous wet samples and controls were weighed into 50 ml centrifuge  
120 tubes. The control samples were fortified with diazinon standard solution to achieve the  $0.01\mu\text{g/g}$   
121 for LC-MS/MS. Using an automatic pipette, 50  $\mu\text{l}$  of procedural internal standards (dimethoate D6  
122 (10 ppm) and malathion D10 (10 ppm)) were added to the contents of the centrifuge tubes. To the  
123 contents of the centrifuge tube,  $10.0 \pm 0.2$  ml extraction solvent acetonitrile (MeCN) HPLC grade  
124 was added. The tube was immediately closed and shaken vigorously by Geno grinder for 1 minute  
125 at 1000 revolutions per minute (rpm). The resulting homogenous mixture in the centrifuge tube was  
126 then subjected to liquid-liquid partitioning step using 6.5 g of premixed extraction salts. The  
127 extraction salts comprised  $4.0 \pm 0.2$  g magnesium sulphate anhydrous for removal of water and

128 salting out MeCN;  $1.0 \pm 0.05$  g sodium chloride to increase selectivity of analyte by reducing  
129 amount of co-extracted matrix;  $1.0 \pm 0.05$  g trisodium citrate dihydrate and  $0.5 \pm 0.03$  g disodium  
130 hydrogen citrate sesquihydrate as a citrate buffer for pH adjustment. The tube was closed and  
131 immediately shaken vigorously by hand to avoid caking. The mixture was again shaken by Geno  
132 grinder for 1 minute with 1000 rpm then centrifuged for 5 minutes at 3700 rpm. An aliquot of 500  
133  $\mu$ l of the mixture was transferred into a 2.0 ml vial followed with 495  $\mu$ l of HPLC grade water and  
134 5  $\mu$ l of injection internal standard dimethoate D6 (10 ppm). The mixture was vortexed to mix for  
135 LC-MS/MS analysis. The extracts were directly subjected to quantitative analysis by LC-MS/MS  
136 (dMRM) mode.

137

### 138 **Preparation of calibration solutions**

139 Calibration solutions were prepared using a control matrix containing no detectable residues of  
140 diazinon analytes. Using an automatic pipette, 4 ml of control blank was put into a 15 ml centrifuge  
141 tube followed with 4 ml of HPLC grade water and vortexed to mix. Reference standard solutions of  
142 diazinon pesticide stocked by KEPHIS were prepared for analysis at concentrations of 0.005  $\mu$ g/ml,  
143 0.01  $\mu$ g/ml, 0.02  $\mu$ g/ml, 0.05  $\mu$ g/ml, 0.075  $\mu$ g/ml, 0.1  $\mu$ g/ml and 0.2  $\mu$ g/ml for validation of method,  
144 and 0.005  $\mu$ g/ml, 0.02  $\mu$ g/ml, 0.05  $\mu$ g/ml, and 0.2  $\mu$ g/ml for routine analysis using the blank  
145 control.

146

### 147 **Instrumentation and instrument specifications**

148 The extracted samples of *Brassica oleracea* var. *acephala* were analysed using Liquid  
149 Chromatography Quadruple Agilent 6430 LC-MS/MS (HPLC) with standard electron spray  
150 ionization (ESI). The HPLC column used was C-18 with an internal diameter of 1.8  $\mu$ m and a  
151 length of 50 cm. The optimization parameters, including solvent gradient, precursor and product  
152 ions, and retention times were set as outlined in method M0326. The column temperature was set at

153 40.0°C. The auto-sampler injection and ejection speed was 200µL/min with an injection volume of  
154 3.00 µL

155

## 156 **Quality control**

157 The 2018 Standard Operating Principles (SOP) number M0326 for QuEChERS Multi-Residue  
158 Method for Analysis of Pesticides Residues (25) in high water matrices validated by Analytical  
159 Chemistry Laboratory of KEPHIS was used in the determination of residue levels. The quality  
160 parameters included repeatability, linearity, accuracy of recovery, method's limits of detection  
161 (LOD) and quantitation (LOQ). Calibration curves were drawn according to analyte ranges of  
162 concentration and response to the LC-ESI-MS/MS. This was achieved by using five replicates of  
163 different concentrations diluted with blank extract samples. Evaluations of accuracy and precision  
164 parameters were done by recovery experiments (recovery range of 93 – 123%) in which each  
165 analyte standard were spiked with blank *Brassica oleracea* var. *acephala* slurry in six replicates.  
166 The replicates were prepared separately at three different concentrations of 10, 20 and 50 µg Kg<sup>-1</sup>.  
167 Limits of detection (LODs) of each analyte was validated by comparing the signal-to-noise (S/N)  
168 ratio magnitude to the background noise obtained from blank sample in the six replicates that  
169 presented mean coefficient of variations (CV) of less than 20%. The time window for the signal - to  
170 - noise (S/N) ratio was set at t < 2 minutes. LOD was calculated using the mathematical expression  
171 (26):

$$172 \quad LOD = \frac{S}{N}ratio \times CV \times Mean\ concentration\ of\ blank\ samples.....(Equation\ 1)$$

173 The limits of quantification (LOQs), defined as the minimum concentration of an analyte that can  
174 be identified and quantified with 99% confidence, was calculated using the mathematical  
175 expression (26):

$$176 \quad LOQ = 10 \times CV \times mean\ concentration\ of\ blank\ samples.....(Equation\ 2)$$

177

178 **Analytical determination of residual diazinon**

179 For quantitative analysis of the analytes, 3 µl of the solvent, matrix control, calibration standards  
180 and spikes, and samples were injected into the LC-MS/MS instrument. Responses were recorded for  
181 both internal standards and samples. A calibration curve of responses against concentration of  
182 calibration standards was obtained. The results of concentrations of residues of diazinon for all the  
183 samples were calculated from responses obtained from the calibration curve. Respective  
184 chromatograms and graphics for quantitation and confirmation were obtained.

185

186 **Statistical analysis**

187 The cross-sectional survey data of diazinon residues in farm gate samples were subjected to  
188 descriptive statistics for purposes of illustrating measures of central tendency and dispersion: mean  
189 concentrations, mode, median, quartiles, standard deviations, minimum and maximum values, range  
190 of values and the coefficient of variations (CV). The diazinon residues levels were also compared  
191 with Codex MRL values of 0.05 mg/kg and evaluated for health risk assessment. For both residue  
192 levels and health risk indices, the standard normal distribution function  $f(z)$  was used to determine  
193 the proportion of values that lie below and above the tolerable values of MRL and HRI. The values  
194 were computed using the formula:

195 
$$\text{Standard normal variable } (z) = \frac{(x - \mu)}{\sigma} \dots\dots\dots(\text{Equation 3})$$

196 Where  $z$  is the standard proportion value;  $x$  is the acceptable value;  $\mu$  is the mean of the data set;  
197 and,  $\sigma$  is the standard deviation of the data set.

198

199 **Residual Pesticide Health Risk Assessment**

200 The residual pesticide health risk indices (HRI) estimations for children ( $HRI_C$ ) and for adults  
201 ( $HRI_A$ ) based on the farm gate samples were estimated using the European Union formula (27):

202 
$$HRI = \frac{EDI}{ADI} \dots\dots\dots (\text{Equation 4})$$



203 Where; HRI is the health risk index; EDI is the estimated daily intake of the pesticide; and ADI is  
204 the acceptable daily intake of the pesticide.

205

206 The EU formula provides that the EDI be determined by multiplying the sample residual pesticide  
207 concentration (mg/kg) by the estimated WHO food consumption rate (kg/day), and dividing by the  
208 number of the estimated WHO average body weight (28).  $HRI > 1.0$  were considered as posing  
209 health risks hence not safe for human health.  $HRI \leq 1.0$  were considered not posing immediate  
210 health risks and thus safe for human health (29,30). The average daily vegetable intake for an adult  
211 of average weight 60 Kg was considered to be 0.345 Kg/person/day while children average daily  
212 intake was considered to be 0.232 kg/person/day for average body weight of 10 kg (31). The  
213 maximum acceptable daily intake (ADI) was considered to be 0.003 mg/kg body weight while the  
214 acute reference dose (ARfD) was 0.03 mg/kg body weight (32).

215

## 216 **RESULTS AND DISCUSSION**

### 217 **Quantification of levels of diazinon residues in the farm-gate baskets of *Brassica oleracea var.*** 218 ***acephala* from the KOSFIP area of Homa Bay County for health risk assessment**

219 Analysis of diazinon residues in the farm-gate *Brassica oleracea var. acephala* samples (Table 1)  
220 using the standard normal distribution function ( $f(z)$ ) showed that 78% of all the samples had  
221 detectable levels of residual diazinon while 22% had non-detectable levels. Similarly, the  
222 percentage of farm gate samples with higher residues of diazinon than the acceptable 0.05 mg/kg  
223 was 70%. The findings were comparatively higher than levels reported by similar studies in Ghana  
224 (31), Nigeria (34) and other parts of Kenya (33,35), that reported trace levels of diazinon residues  
225 with less than 10% of the samples being above the Codex MRL.

226 The measures of central tendency (mean, median and mode) displayed a positively skewed  
227 distribution with a coefficient of variation (CV) of 122% (Table 2). The distribution demonstrated  
228 that the residues levels of diazinon in farm-gate *Brassica oleracea var. acephala* were highly

229 variable with a large range. The variability could be as a result of multiple factors associated with  
230 inadequate training of farmers on good agricultural practices and poor surveillance by respective  
231 national authorities (38). Consequently, farmers in KOSFIP area require regular surveillance and  
232 training on use of diazinon. The findings also suggest that the recommended diazinon application  
233 conditions of rates and pre-harvest intervals may be too short and not suitable for the study area. In  
234 addition, the findings suggest that KOSFIP farm-gate vegetables need thorough washing before  
235 cooking to reduce the leaf surface residual levels on the vegetables. The data set (Table 1) had no  
236 outliers. Corresponding measures of central tendency and dispersion derived from the data set are  
237 shown in Table 2.  
238

239 **Table 1: Levels of diazinon residues in farm-gate baskets of *Brassica oleracea* var. *acephala***  
240 **from selected KOSFIP blocks and resultant EDI and HRI for children and adults.**

| Farms | Mean Conc.<br>(mg/Kg) | EDI <sub>C</sub> | EDI <sub>A</sub> | HRI <sub>C</sub> | HRI <sub>A</sub> |
|-------|-----------------------|------------------|------------------|------------------|------------------|
| 1     | 0.03 ± 0.04           | 0.0007           | 0.0002           | 0.2397           | 0.0594           |
| 2     | 0.00 ± 0.00           | 0.0000           | 0.0000           | 0.0000           | 0.0000           |
| 3     | 0.82 ± 0.40           | 0.0190           | 0.0047           | 6.3421           | 1.5719           |
| 4     | 0.05 ± 0.23           | 0.0012           | 0.0003           | 0.3905           | 0.0968           |
| 5     | 1.07 ± 1.30           | 0.0247           | 0.0061           | 8.2337           | 2.0407           |
| 6     | 0.05 ± 0.06           | 0.0011           | 0.0003           | 0.3681           | 0.0912           |
| 7     | 0.05 ± 0.06           | 0.0012           | 0.0003           | 0.4091           | 0.1014           |
| 8     | 0.02 ± 0.02           | 0.0004           | 0.0001           | 0.1245           | 0.0309           |
| 9     | 0.00 ± 0.00           | 0.0000           | 0.0000           | 0.0000           | 0.0000           |
| 10    | 0.06 ± 0.01           | 0.0014           | 0.0004           | 0.4717           | 0.1169           |
| 11    | 0.83 ± 1.01           | 0.0192           | 0.0048           | 6.4040           | 1.5872           |
| 12    | 0.10 ± 0.07           | 0.0022           | 0.0005           | 0.7347           | 0.1821           |
| 13    | 0.05 ± 0.01           | 0.0011           | 0.0003           | 0.3681           | 0.0912           |
| 14    | 0.06 ± 0.04           | 0.0013           | 0.0003           | 0.4315           | 0.1070           |
| 15    | 0.15 ± 0.18           | 0.0034           | 0.0008           | 1.1329           | 0.2808           |
| 16    | 0.40 ± 0.36           | 0.0094           | 0.0023           | 3.1235           | 0.7741           |
| 17    | 0.03 ± 0.01           | 0.0007           | 0.0002           | 0.2281           | 0.0565           |
| 18    | 0.02 ± 0.03           | 0.0005           | 0.0001           | 0.1748           | 0.0433           |
| 19    | 0.03 ± 0.02           | 0.0007           | 0.0002           | 0.2297           | 0.0569           |
| 20    | 0.65 ± 0.79           | 0.0150           | 0.0037           | 5.0042           | 1.2403           |
| 21    | 0.95 ± 0.12           | 0.0219           | 0.0054           | 7.3157           | 1.8132           |
| 22    | 0.08 ± 0.03           | 0.0018           | 0.0004           | 0.5885           | 0.1459           |
| 23    | 0.02 ± 0.02           | 0.0004           | 0.0001           | 0.1206           | 0.0299           |
| 24    | 0.09 ± 0.01           | 0.0021           | 0.0005           | 0.7061           | 0.1750           |
| 25    | 0.04 ± 0.05           | 0.0010           | 0.0002           | 0.3349           | 0.0830           |
| 26    | 0.20 ± 0.15           | 0.0047           | 0.0012           | 1.5567           | 0.3858           |
| 27    | 0.54 ± 0.05           | 0.0125           | 0.0031           | 4.1822           | 1.0365           |
| 28    | 0.00 ± 0.00           | 0.0000           | 0.0000           | 0.0000           | 0.0000           |
| 29    | 0.05 ± 0.06           | 0.0011           | 0.0003           | 0.3828           | 0.0949           |
| 30    | 0.12 ± 0.04           | 0.0027           | 0.0007           | 0.9017           | 0.2235           |
| 31    | 0.04 ± 0.05           | 0.0010           | 0.0002           | 0.3333           | 0.0826           |
| 32    | 0.66 ± 0.20           | 0.0152           | 0.0038           | 5.0738           | 1.2575           |
| 33    | 0.44 ± 0.14           | 0.0103           | 0.0025           | 3.4290           | 0.8499           |
| 34    | 1.06 ± 0.89           | 0.0245           | 0.0061           | 8.1579           | 2.0219           |
| 35    | 0.06 ± 0.04           | 0.0014           | 0.0003           | 0.4632           | 0.1148           |
| 36    | 0.74 ± 0.90           | 0.0172           | 0.0043           | 5.7327           | 1.4208           |
| 37    | 1.00 ± 1.01           | 0.0231           | 0.0057           | 7.7094           | 1.9107           |
| 38    | 0.04 ± 0.02           | 0.0010           | 0.0002           | 0.3209           | 0.0795           |
| 39    | 0.41 ± 0.07           | 0.0096           | 0.0024           | 3.1877           | 0.7901           |
| 40    | 0.62 ± 0.74           | 0.0144           | 0.0036           | 4.7885           | 1.1868           |

241  
242 Replicates per farm = 3; EDI<sub>A</sub> – Expected Daily Intake for adults; EDI<sub>C</sub> – Expected Daily  
243 Intake for children; HRI<sub>A</sub> – Health Risk Index for adults; HRI<sub>C</sub> – Health Risk Index for  
244 children; LOD - Limits of Detection (0.0100 mg/Kg); 7.5% ≤ LOD ≤ 92.5%; MRL ≥ 57.5%

245 Given that food safety standards encourage infinitesimal residual levels of pesticide residues  
246 (17), a positively skewed distribution with all measures of dispersion falling below Codex  
247 MRL (0.05 mg/kg) would be most preferable. However, the findings of this study demonstrate  
248 mean residual diazinon concentrations much higher than Codex MRL. As a result, the high  
249 diazinon residues levels in the farm gate samples may pose health risks to consumers.  
250 Subsequently, most of the farm gate *Brassica oleracea var. acephala* vegetables treated with  
251 diazinon at KOSFIP may not therefore be safe for human consumption. The standard normal  
252 distribution function ( $f(z)$ ) for the health risk indices showed that approximately 64% of the  
253 samples could pose health risks to children. Similarly, approximately 26% of the samples could  
254 pose health risks to adults. The findings indicate that children consuming *Brassica oleracea*  
255 *var. acephala* from the study area may be more at risk than adults. These findings were similar  
256 to the levels reported in some vegetables of Bangladesh (39), Kuwait (40), Nigeria (41),  
257 Ghana (42) and Sudan (43), where over 30% of samples reported residue levels above the  
258 Codex MRLs. The estimated daily intake ( $EDI_C$ ) and resulting health risk indices for children  
259 ( $HRI_C$ ) indicate that children consuming the vegetable from the study area have higher chances  
260 of developing diazinon related health problems (44,45). Given that data on residual levels with  
261 computed EDI and HRI for children are not available, comparisons of health risk factors for  
262 children in different regions have not been done.

263

264

265

266

267

268

269 **Table 2: Measures of central tendency and dispersion for levels of diazinon residues in farm-**  
 270 **gate baskets of *Brassica oleracea var. acephala* from KOSFIP area and resultant EDI and**  
 271 **HRI for children and adults.**

| Measure of Central Tendency & Dispersion | Mean Conc. (mg/Kg) | EDI <sub>C</sub> | EDI <sub>A</sub> | HRI <sub>C</sub> | HRI <sub>A</sub> |
|------------------------------------------|--------------------|------------------|------------------|------------------|------------------|
| Mode                                     | 0.05               | 0.00             | 0.00             | 0.37             | 0.09             |
| Minimum                                  | 0.00               | 0.00             | 0.00             | 0.00             | 0.00             |
| 1 <sup>st</sup> Quartile                 | 0.04               | 0.00             | 0.00             | 0.33             | 0.08             |
| Median                                   | 0.07               | 0.00             | 0.00             | 0.53             | 0.13             |
| 3 <sup>rd</sup> Quartile                 | 0.56               | 0.01             | 0.00             | 4.33             | 1.07             |
| Inter Quartile R                         | 0.52               | 0.01             | 0.00             | 4.00             | 0.99             |
| Maximum                                  | 1.06               | 0.02             | 0.01             | 8.23             | 2.04             |
| Range                                    | 1.06               | 0.02             | 0.01             | 8.23             | 2.04             |
| Maximum                                  |                    |                  |                  |                  |                  |
| Outliers                                 | 1.34               | 0.03             | 0.01             | 10.34            | 2.56             |
| Mean                                     | 0.2900             | 0.0067           | 0.0017           | 2.2424           | 0.5558           |
| Standard                                 |                    |                  |                  |                  |                  |
| Deviation                                | 0.3532             | 0.0082           | 0.0020           | 2.7314           | 0.6770           |
| CV (%)                                   | 121.8049           | 121.8049         | 121.8049         | 121.8049         | 121.8049         |

272 CV – Coefficient of Variation; EDI<sub>A</sub> – Expected Daily Intake for adults; EDI<sub>C</sub> – Expected  
 273 Daily Intake for children; HRI<sub>A</sub> – Health Risk Index for adults; HRI<sub>C</sub> – Health Risk Index for  
 274 children; Mean concentration of 0.00 represents concentrations below Limits of Detection  
 275 (LOD). Since all values fall below the maximum outlier value, there were no outliers and all  
 276 data were used in the interpretation.

277  
 278 On the other hand, the estimated daily intake for adults (EDI<sub>A</sub>) and resultant health risk index  
 279 for adults (HRI<sub>A</sub>) were comparatively lower than ratios for children (Table 1 and Table 2). The  
 280 findings were similar to residual levels of diazinon in cauliflower of Bangladesh (46), tomatoes  
 281 of Spain (47) and Iran (48), respectively. The effect of the residual levels of diazinon on EDI  
 282 and HRI for adults were higher than the findings in Chinese kale (49), spring onion, parsley  
 283 onion and ginger vegetables in Thailand (50). In addition, the results were also higher than  
 284 those reported for yard long bean in Bangladesh (46), apple in Pakistan (51), *T. occidentalis*  
 285 and *C. argentea* in Nigeria (34), *Brassica oleracea var. acephala* (35,37) and tomatoes (Ngolo  
 286 *et al.*, 2019) in Kenya.

287 However, the results and the resultant EDI and HRI were lower than ratios reported on  
288 eggplant and tomatoes in Pakistan (39,52), watermelon (41), spinach and onions (53) in  
289 Nigeria, tomatoes in Ghana (33), cucumber and tomatoes in Sudan (43). Given the high  
290 variability displayed (coefficient of variation (C.V.) of 122%), the farmers and consumers of  
291 the vegetables are likely to be exposed to diazinon associated health risks (54). These health  
292 challenges may threaten human population in the study area. On the same note, though the  
293 adults have a lower mean ratio of 0.559, continuous consumption of this popular vegetable may  
294 cumulatively raise the exposure levels and result in devastating health impacts (55).

295 The presence of inappropriate levels of diazinon residues in the leaves of *Brassica oleracea*  
296 *var. acephala* may be a consequence of non-adherence to good agricultural practices (GAPs)  
297 such as failing to observe the application conditions of dosage and pre-harvest intervals. Such  
298 disregard are popular with smallholder farmers in developing countries for locally consumed  
299 vegetables (5,15,56) and in regions where surveillance and monitoring activities are  
300 inadequate. The unacceptable residue levels could be due to inability of the farmers to interpret  
301 the rates as prescribed on the labels or utter disregard of the rates, and inadequate surveillance  
302 of farmers on the use of pesticides. Inappropriate levels may also be attributed to inability of  
303 the farmers in the study area to consider other viable methods of pest control provided by  
304 Integrated Pest Management (IPM) guidelines (40,57) during heavy infestations. To manage  
305 the unacceptable residue levels and related health problems, training of farmers on GAP and  
306 alternatives to chemical pest control should be initiated in the study area. National regulatory  
307 agencies should equally strengthen surveillance on farmers with emphasis on observance of  
308 pre-harvest intervals and pesticide dosages. The general public should also be sensitized on the  
309 need to reduce the risks through proper culinary processing of the vegetables before consuming  
310 them. Lastly, the inappropriate residue levels may result from label application conditions  
311 which were extrapolated from field trials done in other regions but not suitable for the study  
312 area. It is therefore well justified to constantly monitor residual levels of diazinon in the

313 vegetable and to develop pesticide safety level monitoring policies to mitigate resultant health  
314 problems due to unacceptable residue levels.

315 In conclusion, the findings in this study showed that most of the farm-gate *Brassica oleracea*  
316 *var. acephala* treated with diazinon within the KOSFIP area of Homa Bay County of Kenya  
317 had higher than tolerable residue levels. The residual diazinon quantities may pose significant  
318 health risks to the consumers. The high levels suggested that most farmers of *Brassica oleracea*  
319 *var. acephala* who use diazinon within the KOSFIP area may not be observing good  
320 agricultural practices (GAPs). Consequently, there is need to restrict use of diazinon on  
321 *Brassica oleracea var. acephala* at KOSFIP and to consider alternative pesticides with shorter  
322 PHIs to reduce high levels of residual diazinon in farm gate vegetables. In addition, there is  
323 need for a survey study into the extent of good agricultural practices (GAPs) with respect to  
324 pesticide use in the production of *Brassica oleracea var. acephala* and other vegetables within  
325 the KOSFIP area of Homa Bay County. On the same note, there is need for health risk index  
326 (HRI) determination for various age groups with estimated local weights, consumption rates  
327 and pesticide safety levels (PSL) adapted to the local environment. Finally, there is need for a  
328 comparative study on the effects of processing (washing, blanching, cooking) to establish if  
329 such processing methods significantly reduces diazinon residue levels in *Brassica oleracea var.*  
330 *acephala* of KOSFIP area.

331 This study has provided baseline information required for the establishment of Good  
332 Agricultural Practices (GAP) towards sustainable use of diazinon in production of *Brassica*  
333 *oleracea var. acephala* in the KOSFIP area. The study has provided a basis for discouraging  
334 the use of diazinon in the production of *Brassica oleracea var. acephala* in KOSFIP and other  
335 environments.

336

## 337 **Acknowledgements**

338 The authors appreciate Lillian Cheron of KOSFIP for her support as an agronomist, and Joab  
339 Oloo Onyango for provision of experimental plots within the KOSFIP scheme. In addition, the  
340 authors acknowledge the management of Kenya Plant Health Inspectorate Services (KEPHIS),  
341 and the KEPHIS Analytical Chemistry Laboratories technical team at Karen - Nairobi:  
342 Onesmus Mwniki, Lucy Nyamu, Samwel Maiyo, Edmond Momanyi, Aeline Kiptum, James  
343 Njenga, and Robert Njuguna Koigi. Finally, we appreciate the members of Prof Owuor's  
344 research group and Dr. Charles Ochieng for their critique to the thought processes.

345

## 346 **REFERENCES**

- 347 1. FAO. Sustainable Development Goals: Working for Zero Hunger. Transforming food  
348 and agriculture to achieve the SDGs [Internet]. Rome, Italy: Food and Agriculture  
349 Organization of the United Nations; 2018. Available from: <http://www.fao.org/>
- 350 2. Pandya IY. Pesticides and their applications in agriculture. *Asian J Appl Sci Technol.*  
351 2018;2(2):894–900.
- 352 3. Botwe BO. Organochlorine pesticide residues contamination of Ghanaian market  
353 vegetables. *J Environ Issues Agric Dev Ctries.* 2007;3(2):1–6.
- 354 4. Hanson R, Dodoo DK, Essumang DK, Blay J, Yankson K. The effect of some selected  
355 pesticides on the growth and reproduction of fresh water *Oreochromis niloticus*,  
356 *Chrysichthys nigrodigitatus* and *Clarias gariepinus*. *Bull Environ Contam Toxicol.* 2007  
357 Nov;79(5):544–7.
- 358 5. Kiwango P, Kassim N, Kimanya M. Pesticide residues in vegetables: Practical  
359 interventions to minimize the risk of human exposure in Tanzania. *Curr J Appl Sci*  
360 *Technol [Internet].* 2018 Feb 22;26(1):1–18. Available from:  
361 <http://www.sciencedomain.org/abstract/23292>
- 362 6. Francisco SB. Impacts of agricultural pesticides on terrestrial ecosystems. In: Sanchez-  
363 Bayo F, Brink PJ, Mann RM, editors. *Ecological Impacts of Toxic Chemicals.* Sydney,



- 364 Australia: Bentham Science Publishers. Sydney, Australia; 2011.
- 365 7. Juraske R, Mutel CL, Stoessel F, Hellweg S. Life cycle human toxicity assessment of  
366 pesticides: Comparing fruit and vegetable diets in Switzerland and the United States.  
367 Chemosphere [Internet]. 2009 Nov;77(7):939–45. Available from:  
368 <https://linkinghub.elsevier.com/retrieve/pii/S0045653509009497>
- 369 8. Claeys WL, Schmit JFF, Bragard C, Maghuin-Rogister G, Pussemier L, Schiffers B.  
370 Exposure of several Belgian consumer groups to pesticide residues through fresh fruit  
371 and vegetable consumption. Food Control [Internet]. 2011 Mar;22(3–4):508–16.  
372 Available from: <https://linkinghub.elsevier.com/retrieve/pii/S0956713510003294>
- 373 9. WHO. Pesticide residues in food and feed [Internet]. Geneva: World Health  
374 Organization. Geneva. <http://www.codexalimentarius.net>; 2015 [cited 2018 Jun 15]. 1–  
375 76 p. Available from: <http://www.codexalimentarius.net>
- 376 10. Šamec D, Urlić B, Salopek-Sondi B. Kale ( *Brassica oleracea* var. *acephala* ) as a  
377 superfood: Review of the scientific evidence behind the statement. Crit Rev Food Sci  
378 Nutr [Internet]. 2019 Aug 22;59(15):2411–22. Available from:  
379 <https://www.tandfonline.com/doi/full/10.1080/10408398.2018.1454400>
- 380 11. USDA. Vol. 1, United States Department of Agriculture. 2014 [cited 2018 May 7]. p.  
381 339 Census of Agriculture 2012. Available from: [www.nass.usda.gov](http://www.nass.usda.gov).
- 382 12. Rosa E, Heany R. Seasonal variation in protein, mineral and glucosinolate composition  
383 of Portuguese cabbages and kale. Anim Feed Sci Technol. 1996;57:111–27.
- 384 13. Seif AA, Nyambo B. Integrated pest management for Brassica production in East Africa.  
385 2013. 80 p.
- 386 14. Sarah M, Maina M. Vegetables in East Africa: Farming Resources Series. Nairobi,  
387 Kenya: Elewa Publications, Nairobi.; 2008.
- 388 15. FAO. Good Agricultural Practices (GAP) on horticultural production for extension staff  
389 in Tanzania. Training manual [Internet]. Rome, Italy: Food and Agriculture  
390 Organization of the United Nations; 2010. 1–178 p. (GAP Working Paper Series).



- 418 J Res Soc Sci Humanit [Internet]. 2020;01(05):10–26. Available from:  
419 <https://www.ijrss.org/index.php/ijrss/article/view/43/34>
- 420 23. Opere AO, Njogu AK. Using extreme value theory to estimate available water in the  
421 upper Awach-Kibuon catchment in Nyamira County, Kenya. Am J Water Resour  
422 [Internet]. 2020 Sep 2;8(4):200–10. Available from:  
423 <http://pubs.sciepub.com/ajwr/8/4/6/index.html>
- 424 24. Krejcie R V., Morgan DW. Determining sample size for research activities. Educ  
425 Psychol Meas [Internet]. 1970 Sep 2;30(3):607–10. Available from:  
426 <http://journals.sagepub.com/doi/10.1177/001316447003000308>
- 427 25. Anastassiades M, Lehotay SJ, Stajnbaher D, Schenck FJ. Fast and easy multiresidue  
428 method employing acetonitrile extraction/partitioning and “dispersive solid-phase  
429 extraction” for the determination of pesticide residues in produce. J Assoc Off Agric  
430 Chem Int. 2003;86:412–31.
- 431 26. European Union. Guidance document on the estimation of LOD and LOQ for  
432 measurements in the field of contaminants in feed and food. Wenzl T, Haedrich J,  
433 Schaechtele A, Robouch P, Stroka J, editors. Luxembourg: Publications Office of the  
434 European Union, Joint research Centre Technical Reports; 2016. 1–58 p.
- 435 27. European Union. Pesticide Database. Maximum residue levels as determined by EC  
436 regulation 396/2005 [Internet]. European Community; 2005 [cited 2019 Jun 20].  
437 Available from:  
438 [http://ec.europa.ec/food/plant/pesticides/legislation/max\\_residue\\_levels.en.htm](http://ec.europa.ec/food/plant/pesticides/legislation/max_residue_levels.en.htm)
- 439 28. WHO & FAO. Principles and methods for the risk assessment of chemicals in food  
440 [Internet]. Food and Agriculture Organization of the United Nations and the World  
441 Health Organization. Food and Agriculture Organization of the United Nations and the  
442 World Health Organization, Geneva.; 2009. 1–752 p. Available from:  
443 <http://www.tandfonline.com/doi/full/10.1080/00207233.2010.549617>
- 444 29. Darko G, Akoto O. Dietary intake of organophosphorus pesticide residues through

- 445 vegetables from Kumasi, Ghana. *Food Chem Toxicol* [Internet]. 2008 Dec;46(12):3703–  
446 6. Available from: <https://linkinghub.elsevier.com/retrieve/pii/S0278691508005462>
- 447 30. WHO. Measuring Intake of Fruit and Vegetables. Background Paper for the FAO/WHO  
448 Workshop on Fruit and Vegetables for Health. Geneva: World Health Organization;  
449 2005. 1–40 p.
- 450 31. Wang X, Sato T, Xing B, Tao S. Health risks of heavy metals to the general public in  
451 Tianjin, China via consumption of vegetables and fish. *Sci Total Environ*. 2005;350(1–  
452 3):28–37.
- 453 32. FAO & WHO. Pesticide residues in food 2016. Report of the special session of the joint  
454 meeting of the FAO panel of experts on pesticide residues in food and the environment  
455 and the WHO core assessment group on pesticide residues. [Internet]. Geneva,  
456 Switzerland: Food and Agriculture Organization and World Health Organization; 2016.  
457 Available from: <http://www.fao.org>
- 458 33. Bempah C, Asomaning J, Boateng J. Market basket survey for some pesticides residues  
459 in fruits and vegetables from Ghana. *J Microbiol Biotechnol Food Sci*. 2012;2(3):850–  
460 71.
- 461 34. Njoku KL, Ezeh CV, Obidi FO, Akinola MO. Assessment of pesticide residue levels in  
462 vegetables sold in some markets in Lagos State, Nigeria. *Niger J Biotechnol* [Internet].  
463 2017 Apr 24;32(1):53–60. Available from:  
464 <https://www.ajol.info/index.php/njb/article/view/155268>
- 465 35. Karanja NK, Njenga M, Mutua GK, Lagerkvist CJ, Kutto E, Okello JJ. Concentrations  
466 of heavy metals and pesticide residues in leafy vegetables and implications for Peri-  
467 urban farming in Nairobi, Kenya. *J Agric Food Syst Community Dev* [Internet]. 2012  
468 Oct 22;3(1):255–67. Available from:  
469 <https://foodsystemsjournal.org/index.php/fsj/article/view/152>
- 470 36. MoALF. Kenya County Climate Risk Profile Series: Climate Risk Profile for Homa Bay  
471 County. Nairobi, Kenya: Ministry of Agriculture, Livestock and Fisheries, Nairobi,

- 472 Kenya; 2016. p. 1–128.
- 473 37. Ngolo P, Nawiri M, Machocho A, Oyieke H. Pesticide residue levels in soil, water, kales  
474 and tomatoes in Ewaso Narok Wetland, Laikipia, County, Kenya. *J Sci Res Reports*  
475 [Internet]. 2019 Sep 23;24(5):1–11. Available from:  
476 <http://journaljsrr.com/index.php/JSRR/article/view/30165>
- 477 38. WHO & FAO. Global Situation of Pesticide Management in Agriculture and Public  
478 Health. Report of a 2018 WHO-FAO Survey. [Internet]. Geneva, Switzerland & Rome,  
479 Italy: World Health Organization and Food and Agriculture Organization; 2019.  
480 Available from: <http://www.fao.org/3/ca5201en/ca5201en.pdf>
- 481 39. Alam MN, Chowdhury M, Alamgir Z, Hossain MS, Mijanur R, Rahman MA, et al.  
482 Detection of residual levels and associated health risk of seven pesticides in fresh  
483 eggplant and tomato samples from Narayanganj District, Bangladesh. *J Chem* [Internet].  
484 2015;2015:1–7. Available from: <http://www.hindawi.com/journals/jchem/2015/243574/>
- 485 40. Jallow M, Awadh DG, Albaho MS, Devi VY, Thomas BM. Pesticide knowledge and  
486 safety practices among farm workers in Kuwait: Results of a survey. *Int J Environ Res*  
487 *Public Health* [Internet]. 2017 Mar 24;14(4):340–55. Available from:  
488 <http://www.mdpi.com/1660-4601/14/4/340>
- 489 41. Musa M, Akan JC, Zakari M, Naomi B. Assessment of organophosphorus and  
490 pyrethroid pesticide residues in watermelon (*Citrus lanatus*) and soil samples from  
491 Gashua, Bade Local Government area Yobe State, Nigeria. *J Environ Pollut Hum Heal*.  
492 2015;3(3):52–61.
- 493 42. Ato FA. Assessment of pesticide residues in vegetables at the farm gate: Cabbage  
494 (*Brassica oleracea*) cultivation in Cape Coast, Ghana. *Res J Environ Toxicol* [Internet].  
495 2011 Mar 1;5(3):180–202. Available from:  
496 <http://www.scialert.net/abstract/?doi=rjet.2011.180.202>
- 497 43. Awad OM, Adam AM, Ahmed MAH, Abd ES, Ishag EMET, Asia AD. Pesticide  
498 residues detected on tomato and cucumber fruits grown in greenhouse farms in

- 499 Khartoum State , Sudan. *Int J Life Sci Res*. 2018;6(3):472–81.
- 500 44. Hancock DB, Martin ER, Mayhew GM, Stajich JM, Jewett R, Stacy MA, et al. Pesticide  
501 exposure and risk of Parkinson’s disease: A family-based case-control study. *BioMed*  
502 *Cent Neurol* [Internet]. 2008 Dec 28;8(1):6. Available from:  
503 <http://bmcneurol.biomedcentral.com/articles/10.1186/1471-2377-8-6>
- 504 45. Kishi M. The health impacts of pesticides: what do we now know? In: Pretty J, editor.  
505 *The Pesticide Detox Towards a More Sustainable Agriculture*. London: Earthscan,  
506 London; 2005. p. 23–38.
- 507 46. Sultan A, Rahman A, Begum A, Chowdhury AZ, Reza S. Multi insecticide residue  
508 analysis in vegetables collected from different regions of Bangladesh. *Asian-*  
509 *Australasian J Biosci Biotechnol* [Internet]. 2016;1(3):547–51. Available from:  
510 <http://www.ebupress.com/journals/aajbb>
- 511 47. Fenoll J, Hellin P, Martinez C, Miguel M, Flores P. Multiresidue method for analysis of  
512 pesticides in pepper and tomato by gas chromatography with nitrogen–phosphorus  
513 detection. *Food Chem* [Internet]. 2007;105(2):711–9. Available from:  
514 <https://linkinghub.elsevier.com/retrieve/pii/S0308814607000556>
- 515 48. Rohani FG, Mahdavi V, Amina MM. Evaluation of diazinon and oxydemeton-methyl  
516 residues by GC/NPD in tomatoes grown in Kerman greenhouses. *J Agric Sci Technol*.  
517 2017;19(1):113–29.
- 518 49. Wanwimolruk S, Kanchanamayoon O, Phopin K, Prachayasittikul V. Food safety in  
519 Thailand 2: Pesticide residues found in Chinese kale (*Brassica oleracea*), a commonly  
520 consumed vegetable in Asian countries. *Sci Total Environ* [Internet]. 2015 Nov  
521 1;532:447–55. Available from: <http://dx.doi.org/10.1016/j.scitotenv.2015.04.114>
- 522 50. Sapbamrer R, Hongsibsong S. Organophosphorus pesticide residues in vegetables from  
523 farms, markets, and a supermarket around Kwan Phayao Lake of Northern Thailand.  
524 *Arch Environ Contam Toxicol* [Internet]. 2014 Jul 8;67(1):60–7. Available from:  
525 <http://link.springer.com/10.1007/s00244-014-0014-x>

- 526 51. Asi MR. Solid-phase extraction and chromatographic determination of pesticides in food  
527 and water samples. Doctoral Dissertation. University of the Punjab, Lahore, Pakistan;  
528 2003.
- 529 52. Latif Y, Sherazi STH, Bhangar MI. Assessment of pesticide residua in commonly used  
530 vegetables in Hyderabad , Ecotoxicology and Environmental Safety Assessment of  
531 pesticide residues in commonly used vegetables in Hyderabad , Pakistan. Ecotoxicol  
532 Environ Saf [Internet]. 2011;74(8):2299–303. Available from:  
533 <http://dx.doi.org/10.1016/j.ecoenv.2011.07.030>
- 534 53. Akan JC, Jafiya L, Mohamed Z, Abdulrahman FI. Organophosphorus pesticide residues  
535 in vegetable and soil samples from Alau Dam and Gongulong Agricultural Areas, Borno  
536 State, Nigeria. Int J Environ Monit Anal [Internet]. 2013;1(2):58–64. Available from:  
537 [http://www.sciencepublishinggroup.com/journal/paperinfo.aspx?journalid=162&doi=10.](http://www.sciencepublishinggroup.com/journal/paperinfo.aspx?journalid=162&doi=10.11648/j.ijema.20130102.14)  
538 [11648/j.ijema.20130102.14](http://www.sciencepublishinggroup.com/journal/paperinfo.aspx?journalid=162&doi=10.11648/j.ijema.20130102.14)
- 539 54. Jallow M, Awadh DG, Albaho MS, Devi VY, Thomas BM. Pesticide risk behaviors and  
540 factors influencing pesticide use among farmers in Kuwait. Sci Total Environ [Internet].  
541 2017 Jan 1;574:490–8. Available from:  
542 <https://linkinghub.elsevier.com/retrieve/pii/S0048969716320046>
- 543 55. Savage EP, Keefe TJ, Mounce LM, Heaton RK, Lewis JA, Burcar PJ. Chronic  
544 neurological sequelae of acute organophosphate pesticide poisoning. Arch Environ Heal  
545 An Int J [Internet]. 1988 Feb;43(1):38–45. Available from:  
546 <http://www.tandfonline.com/doi/abs/10.1080/00039896.1988.9934372>
- 547 56. FAO. Report of the FAO Internal Workshop on Good Agricultural Practices [Internet].  
548 Rome, Italy: Food and Agriculture Organization of the United Nations; 2007. 1–42 p.  
549 (FAO GAP Working Paper Series). Available from:  
550 [http://www.fao.org/prods/GAP/gapactivities\\_en.asp](http://www.fao.org/prods/GAP/gapactivities_en.asp)
- 551 57. Zyoud SH, Sawalha AF, Sweileh WM, Awang R, Al-Khalil SI, Al-Jabi SW, et al.  
552 Knowledge and practices of pesticide use among farm workers in the West Bank,

- 553 Palestine: safety implications. *Environ Health Prev Med* [Internet]. 2010 Jul  
554 10;15(4):252–61. Available from: <http://link.springer.com/10.1007/s12199-010-0136-3>  
555
